# Supplementary material
Source: HighWire-hosted journal article supplement (https://erj.ersjournals.com/content/54/1/1801991)
Supplement: inline-supplementary-material-1 [file inline-supplementary-material-1.pdf]

Table E1. Requested to and retrieved items from contact authors

|                                                             | de Mello <i>et al.</i> (37) | Ellender <i>et al.</i> (38) | Jarand <i>et al.</i> (39) | Koh <i>et al.</i> 2016(42) | Koh <i>et al.</i> 2017(43) | Namkoong <i>et al.</i> (40) | Park <i>et al.</i> (44) | van Ingen <i>et al.</i> (41) |
|-------------------------------------------------------------|-----------------------------|-----------------------------|---------------------------|----------------------------|----------------------------|-----------------------------|-------------------------|------------------------------|
| <b>Demography</b>                                           |                             |                             |                           |                            |                            |                             |                         |                              |
| Age                                                         | *                           | *                           | *                         | *                          | *                          | *                           | *                       | *                            |
| Sex                                                         | *                           | *                           | *                         | *                          | *                          | *                           | *                       | *                            |
| Body mass index                                             | -                           | *                           | *                         | *                          | *                          | *                           | *                       | *                            |
| Smoking status                                              | *                           | -                           | *                         | *                          | *                          | *                           | *                       | *                            |
| <b>Medical history</b>                                      |                             |                             |                           |                            |                            |                             |                         |                              |
| Previous history of treatment for NTM/TB                    | *                           | -                           | *                         | *                          | *                          | *                           | *                       | *                            |
| Chronic obstructive pulmonary disease                       | *                           | *                           | *                         | *                          | *                          | *                           | *                       | *                            |
| Asthma                                                      | *                           | -                           | *                         | *                          | *                          | *                           | *                       | *                            |
| Cystic fibrosis                                             | *                           | *                           | *                         | *                          | *                          | *                           | *                       | -                            |
| Bronchiectasis                                              | *                           | *                           | *                         | *                          | *                          | *                           | *                       | *                            |
| Malignancy                                                  | *                           | -                           | *                         | *                          | *                          | *                           | *                       | *                            |
| Chronic kidney disease                                      | *                           | -                           | *                         | *                          | *                          | *                           | *                       | -                            |
| Chronic liver disease                                       | *                           | -                           | *                         | *                          | *                          | *                           | *                       | -                            |
| Diabetes mellitus                                           | *                           | -                           | *                         | *                          | *                          | *                           | *                       | *                            |
| HIV infection                                               | *                           | -                           | *                         | *                          | *                          | *                           | *                       | *                            |
| Immune-suppressive agent or steroid use                     | *                           | -                           | *                         | *                          | *                          | *                           | *                       | *                            |
| <b>AFB smear and culture</b>                                |                             |                             |                           |                            |                            |                             |                         |                              |
| AFB smear positivity (or quantification)                    | -                           | *                           | -                         | *                          | *                          | *                           | *                       | *                            |
| Culture sample origin (sputum/bronchial washing/BAL/tissue) | *                           | *                           | -                         | *                          | *                          | *                           | *                       | *                            |
| <b>Drug susceptibility test results (MIC)</b>               |                             |                             |                           |                            |                            |                             |                         |                              |
| Clarithromycin (day 3, 7, and 14)                           | -                           | -                           | -                         | *                          | *                          | *                           | *                       | *                            |
| Amikacin                                                    | -                           | -                           | -                         | *                          | *                          | *                           | *                       | *                            |
| Cefoxitin                                                   | -                           | -                           | -                         | *                          | *                          | -                           | *                       | *                            |
| Ciprofloxacin                                               | -                           | -                           | -                         | *                          | *                          | -                           | *                       | *                            |
| Moxifloxacin                                                | -                           | -                           | -                         | *                          | *                          | -                           | *                       | *                            |
| Imipenem                                                    | -                           | -                           | -                         | *                          | *                          | -                           | *                       | *                            |
| Linezolid                                                   | -                           | -                           | -                         | *                          | *                          | -                           | *                       | *                            |

|                                                                                  |   |   |   |   |   |   |   |   |
|----------------------------------------------------------------------------------|---|---|---|---|---|---|---|---|
| Tigecycline                                                                      | - | - | - | * | * | - | * | * |
| <b>Symptoms present prior to treatment</b>                                       |   |   |   |   |   |   |   |   |
| Hemoptysis                                                                       | - | * | * | * | * | * | * | * |
| Cough                                                                            | - | - | * | * | * | * | * | * |
| Sputum                                                                           | - | - | * | * | * | * | * | * |
| Dyspnea                                                                          | - | - | * | - | - | * | * | * |
| Weight loss                                                                      | - | * | * | * | * | * | * | * |
| Fever                                                                            | - | - | * | * | * | * | * | * |
| Night sweat                                                                      | - | * | * | - | - | * | * | * |
| Malaise                                                                          | - | - | * | - | - | * | * | * |
| <b>Radiographic features prior to treatment</b>                                  |   |   |   |   |   |   |   |   |
| Nodular bronchiectatic                                                           | * | * | * | * | * | * | * | * |
| Fibrocavitary                                                                    | * | * | * | * | * | * | * | * |
| Indeterminate                                                                    | * | * | * | * | * | * | * | * |
| Extent of disease (number of involved lobes or bilateral/unilateral involvement) | * | - | * | - | - | * | * | * |
| <b>Medical treatment</b>                                                         |   |   |   |   |   |   |   |   |
| Clarithromycin                                                                   | * | * | * | * | * | * | * | * |
| Azithromycin                                                                     | * | * | * | * | * | * | * | * |
| Amikacin                                                                         | * | * | * | * | * | * | * | * |
| Cefoxitin                                                                        | * | * | * | * | * | * | * | * |
| Imipenem                                                                         | * | * | * | * | * | * | * | * |
| Moxifloxacin or levofloxacin                                                     | * | * | * | * | * | * | * | * |
| Linezolid                                                                        | - | - | * | * | * | * | * | * |
| Tigecycline                                                                      | * | - | * | * | * | * | * | * |
| Clofazimine                                                                      | - | * | * | * | * | * | * | * |
| Other                                                                            | * | * | * | * | * | * | * | * |
| <b>Detailed treatment history</b>                                                |   |   |   |   |   |   |   |   |
| Subspecies identification result                                                 | * | * | - | * | * | * | * | * |
| Time from diagnosis to treatment                                                 | - | - | - | - | - | * | * | * |
| Duration of total treatment                                                      | * | * | * | * | * | * | * | * |

|                                                                                  |   |   |   |   |   |   |   |   |
|----------------------------------------------------------------------------------|---|---|---|---|---|---|---|---|
| Duration of intravenous treatment                                                | - | * | * | * | * | * | * | - |
| Daily or thrice weekly treatment                                                 | - | - | - | * | * | * | * | - |
| Hospitalization (or outpatient setting)                                          | - | - | - | * | * | * | * | - |
| <b>Surgical resection</b>                                                        |   |   |   |   |   |   |   |   |
| Segmentectomy/lobectomy/pneumonectomy                                            | - | - | * | * | * | * | * | - |
| <b>Treatment outcomes</b>                                                        |   |   |   |   |   |   |   |   |
| Culture conversion for 12 months while on treatment or till the end of treatment | * | * | * | * | * | * | * | * |
| AFB smear and culture results at each clinic visit                               | - | * | * | * | * | * | * | * |
| Symptom improvement or worsening after treatment                                 | * | * | * | * | * | * | * | * |
| Radiographic improvement or worsening after treatment                            | * | - | * | * | * | * | * | * |
| Death prior to planned treatment completion                                      | * | * | * | * | * | * | * | * |
| Loss to follow-up or discontinuation prior to planned treatment completion       | * | * | * | - | - | * | * | * |
| <b>Adverse drug reactions</b>                                                    |   |   |   |   |   |   |   |   |
| Allergic reaction or anaphylaxis                                                 | - | - | * | * | * | * | * | * |
| Skin irritation                                                                  | - | - | * | * | * | * | * | * |
| Gastro-intestinal disturbance                                                    | - | - | * | * | * | * | * | * |
| Abnormal liver function test                                                     | - | - | * | * | * | * | * | * |
| Acute kidney injury                                                              | - | * | * | * | * | * | * | * |
| Ototoxicity                                                                      | - | * | * | * | * | * | * | * |
| Ocular toxicity                                                                  | - | * | * | * | * | * | * | * |
| Neuropathy                                                                       | - | - | * | * | * | * | * | * |
| Others                                                                           | - | - | * | - | - | * | * | * |
| <b>Follow-up after treatment</b>                                                 |   |   |   |   |   |   |   |   |
| Total duration of follow-up after treatment                                      | - | - | * | * | * | - | * | * |
| Recurrence or relapse during follow-up                                           | - | - | * | * | * | * | * | * |

|                                                                             |   |   |   |   |   |   |   |   |
|-----------------------------------------------------------------------------|---|---|---|---|---|---|---|---|
| Co-infection with other NTM species while on treatment and during follow-up | - | - | * | - | - | * | * | * |
|-----------------------------------------------------------------------------|---|---|---|---|---|---|---|---|

Abbreviation: NTM, nontuberculous mycobacterium; TB, tuberculosis; HIV, human immuno-deficiency virus; AFB, acid-fast bacilli; BAL, bronchial alveolar lavage; MIC, minimal inhibitory concentration

Asterisk and dash mean the presence and absence of the items, respectively

Table E2. Quality assessment of included studies

| Study [Ref.]                 | Selection                                        |                                                |                                                               | Measurement     |                              |                 | Outcome                                                              |                                                                                            |                                             |                 |
|------------------------------|--------------------------------------------------|------------------------------------------------|---------------------------------------------------------------|-----------------|------------------------------|-----------------|----------------------------------------------------------------------|--------------------------------------------------------------------------------------------|---------------------------------------------|-----------------|
|                              | Representativ-<br>eness of<br>MAB-PD<br>patients | Ascertainm-<br>ent of<br>treatment<br>regimens | Confirmation<br>of MAB<br>through<br>mycobacterial<br>culture | Risk of<br>bias | Subspecies<br>identification | Risk of<br>bias | Explicit<br>treatment<br>outcome<br>assessment by<br>culture results | Adequate<br>treatment<br>duration<br>(Intention to<br>treat for more<br>than 12<br>months) | Adequacy of<br>follow-up after<br>treatment | Risk of<br>bias |
| de Mello <i>et al.</i> (37)  | *                                                | *                                              | *                                                             | low             | *                            | low             | *                                                                    | *                                                                                          | *                                           | low             |
| Ellender <i>et al.</i> (38)  | *                                                | *                                              | *                                                             | low             | *                            | low             | *                                                                    | *                                                                                          | -                                           | medium          |
| Jarand <i>et al.</i> (39)    | *                                                | *                                              | *                                                             | low             | -                            | high            | *                                                                    | *                                                                                          | *                                           | low             |
| Koh <i>et al.</i> 2016(42)   | *                                                | *                                              | *                                                             | low             | *                            | low             | *                                                                    | *                                                                                          | *                                           | low             |
| Koh <i>et al.</i> 2017(43)   | *                                                | *                                              | *                                                             | low             | *                            | low             | *                                                                    | *                                                                                          | *                                           | low             |
| Namkoong <i>et al.</i> (40)  | -                                                | *                                              | *                                                             | medium          | *                            | low             | *                                                                    | *                                                                                          | -                                           | medium          |
| Park <i>et al.</i> (44)      | *                                                | *                                              | *                                                             | low             | *                            | low             | *                                                                    | *                                                                                          | -                                           | medium          |
| van Ingen <i>et al.</i> (41) | *                                                | *                                              | *                                                             | low             | *                            | low             | *                                                                    | *                                                                                          | *                                           | low             |

Abbreviation: MAB, *Mycobacterium abscessus*; PD, pulmonary disease.

Asterisk and dash mean the presence and absence of the items, respectively

Table E3. Overview of six studies excluded from the analysis (references are below the table)

| Author           | Study period (years) | Region        | Subspecies identification | Total patients (n) | Definition for treatment outcomes                                                                                                                                                                                                       |
|------------------|----------------------|---------------|---------------------------|--------------------|-----------------------------------------------------------------------------------------------------------------------------------------------------------------------------------------------------------------------------------------|
| Jo (32)*         | 1996-2003            | South Korea   | No                        | 29                 | Cure was defined as three or more consecutive negative cultures for 12 months while on treatment and completion of treatment for at least 12 months                                                                                     |
| Lyu, 2011 (17)*  | 2003-2008            | South Korea   | No                        | 41                 | Treatment success was defined to satisfy all of the followings: (1) culture conversion, (2) clinical improvement (3) minimum duration of treatment at least 6 months, (4) completion of treatment according to the physician's decision |
| Harada (33)      | 1990-2010            | Japan         | Yes                       | 102                | Treatment response was assessed as followings: (1) radiological improvement (2) initial sputum conversion to negativity (3) relapse after sputum conversion                                                                             |
| Lyu, 2014 (34)*  | 2006-2012            | South Korea   | Yes                       | 48                 | Treatment success was defined to satisfy all of the followings: (1) culture conversion, (2) clinical improvement (3) minimum duration of treatment at least 6 months, (4) completion of treatment according to the physician's decision |
| Roux (36)†       | 2001-2004            | France        | Yes                       | 43                 | Response to treatment was measured in terms of mycobacterial eradication.                                                                                                                                                               |
| Martiniano (35)‡ | 2006-2014            | United States | Yes                       | 54                 | Subjects with culture conversion (defined as having at least 2 consecutive negative cultures) to negative were classified as “responders”                                                                                               |

\*Population overlap between these studies was estimated.

†All patients had cystic fibrosis. The vast majority of patients were estimated to be non-adults.

‡The patients with refractoriness to previous treatments were included.

Table E4. Detailed characteristics of patients with *M. abscessus* pulmonary disease included in the analysis

|                                                   | de Mello <i>et al.</i> (37) | Ellender <i>et al.</i> (38) | Jarand <i>et al.</i> (39) | Koh <i>et al.</i> 2016(42) | Koh <i>et al.</i> 2017(43) | Namkoong <i>et al.</i> (40) | Park <i>et al.</i> (44) | van Ingen <i>et al.</i> (41) |
|---------------------------------------------------|-----------------------------|-----------------------------|---------------------------|----------------------------|----------------------------|-----------------------------|-------------------------|------------------------------|
| Number of patients                                | 26                          | 13                          | 69                        | 71                         | 67                         | 13                          | 36                      | 8                            |
| Age, years, median[IQR]                           | 54 [46-67]                  | 65[59-67]                   | 59 [53-68]                | 57 [52-64]                 | 57 [48-64]                 | 65 [59-67]                  | 62 [54-68]              | 59 [51-68]                   |
| Sex, female, n (%)                                | 11 (42.3)                   | 12 (92.3)                   | 59 (85.5)                 | 61 (85.9)                  | 52 (77.6)                  | 11 (84.6)                   | 28 (77.8)               | 4 (50.0)                     |
| Body mass index, kg/m <sup>2</sup> , median [IQR] | n/a                         | 21.0 [19.0-22.0]            | 21.0 [20.0-23.0]          | 20.7 [19.1-21.9]           | 20.3 [18.5-22.0]           | 19.1 [17.4-21.0]            | 18.9 [17.7-21.2]        | 19.9 [18.3-22.7]             |
| Current or previous smoker, n (%)                 | 7 (26.9)                    | n/a                         | 24 (34.8)                 | 7 (9.9)                    | 9 (13.4)                   | 2 (15.4)                    | 5 (13.9)                | 6 (75.0)                     |
| Presence of respiratory comorbidities, n (%)      | 11 (42.3)                   | 9 (69.2)                    | 42 (60.9)                 | 68 (95.8)                  | 64 (95.5)                  | 5 (38.5)                    | 15 (41.7)               | 7 (87.5)                     |
| Radiographic findings, n (%)                      |                             |                             |                           |                            |                            |                             |                         |                              |
| Nodular-bronchiectatic                            | 14 (53.8)                   | 0                           | 42 (60.9)                 | 57 (80.3)                  | 53 (79.1)                  | 3 (23.1)                    | 23 (63.9)               | 3 (37.5)                     |
| Fibro-cavitary                                    | 12 (46.2)                   | 2 (15.4)                    | 0                         | 14 (19.7)                  | 11 (16.4)                  | 6 (46.2)                    | 13 (36.1)               | 5 (62.5)                     |
| Indeterminate                                     | 0                           | 11 (84.6)                   | 27 (39.1)                 | 0                          | 3 (4.5)                    | 4 (30.7)                    | 0                       | 0                            |
| Subspecies identification results                 |                             |                             |                           |                            |                            |                             |                         |                              |
| subspecies <i>abscessus</i>                       | 23 (88.5)                   | 4 (30.8)                    | 0                         | 0                          | 67 (100.0)                 | 13 (100.0)                  | 19 (52.8)               | 0                            |
| subspecies <i>massiliense</i>                     | 3 (11.5)                    | 2 (15.4)                    | 1 (1.4)                   | 71 (100.0)                 | 0                          | 0                           | 17 (47.2)               | 1 (12.5)                     |
| subspecies <i>bolletii</i>                        | 0                           | 1 (7.6)                     | 0                         | 0                          | 0                          | 0                           | 0                       | 0                            |
| unidentified                                      | 0                           | 6 (46.2)                    | 68 (98.6)                 | 0                          | 0                          | 0                           | 0                       | 7 (87.5)                     |
| Specification of medical treatment, n (%)         |                             |                             |                           |                            |                            |                             |                         |                              |
| Clarithromycin                                    | 25 (96.2)                   | 8 (61.5)                    | 16 (23.2)                 | 34 (47.9)                  | 40 (59.7)                  | 13 (100)                    | 8 (22.2)                | 2 (25.0)                     |
| Clarithromycin followed by azithromycin           | 0                           | 0                           | 8 (11.6)                  | 15 (21.1)                  | 12 (17.9)                  | 0                           | 5 (13.9)                |                              |
| Azithromycin                                      | 0                           | 5 (38.5)                    | 32 (46.4)                 | 21 (29.6)                  | 15 (22.4)                  | 0                           | 21 (58.3)               | 4 (50.0)                     |
| Azithromycin followed by clarithromycin           | 0                           | 0                           | 1 (1.5)                   | 1 (1.4)                    | 0                          | 0                           | 2 (5.6)                 |                              |
| Intravenous amikacin                              | 18 (69.2)                   | 13 (100.0)                  | 52 (75.4)                 | 71 (100.0)                 | 67 (100.0)                 | 13 (100.0)                  | 28 (77.8)               | 7 (87.5)                     |
| Cefoxitin                                         | 0                           | 10 (76.9)                   | 12 (17.4)                 | 12 (16.9)                  | 1 (1.5)                    | 0                           | 14 (38.9)               | 1 (12.5)                     |
| Cefoxitin followed by imipenem                    | 0                           | 0                           | 5 (7.2)                   | 0                          | 32 (47.8)                  | 0                           | 9 (25.0)                |                              |
| Imipenem                                          | 1 (3.9)                     | 0                           | 30 (43.5)                 | 17 (23.9)                  | 0                          | 4 (30.8)                    | 6 (16.7)                | 5 (62.5)                     |

|                                |           |           |           |           |           |           |           |          |
|--------------------------------|-----------|-----------|-----------|-----------|-----------|-----------|-----------|----------|
| Imipenem followed by cefoxitin | 0         | 0         | 1 (1.5)   | 0         | 0         | 0         | 1 (2.8)   |          |
| Ciprofloxacin                  | 3 (11.5)  | 1 (7.7)   | 29 (42.0) | 24 (33.8) | 33 (49.3) | 0         | 4 (11.1)  | 0        |
| Levofloxacin                   | 0         | 0         | 3 (4.4)   | 0         | 2 (3.0)   | 1 (7.7)   | 5 (13.9)  | 0        |
| Moxifloxacin                   | 0         | 1 (7.7)   | 8 (11.6)  | 12 (16.9) | 29 (43.3) | 0         | 3 (8.3)   | 1 (12.5) |
| Doxycycline                    | 2 (7.7)   | 0         | 1 (1.5)   | 0         | 17 (25.4) | 0         | 0         | 0        |
| Linezolid                      | 0         | 0         | 3 (4.4)   | 0         | 3 (4.5)   | 0         | 1 (2.8)   | 1 (12.5) |
| Tigecycline                    | 1 (3.9)   | 0         | 3 (4.4)   | 0         | 0         | 0         | 0         | 4 (50.0) |
| Clofazimine                    | 1 (3.9)   | 2 (15.4)  | 6 (8.7)   | 2 (2.8)   | 12 (17.9) | 0         | 0         | 7 (87.5) |
| Minocycline                    | 1 (3.9)   | 0         | 4 (5.8)   | 0         | 0         | 3 (23.1)  | 0         | 4 (50.0) |
| Ethambutol                     | 18 (69.2) | 2 (15.4)  | 23 (33.3) | 0         | 0         | 9 (69.2)  | 4 (11.1)  | 0        |
| Rifampicin                     | 0         | 2 (15.4)  | 17 (24.6) | 0         | 0         | 9 (69.2)  | 3 (8.3)   | 0        |
| Trimethoprim/sulfamethoxazole  | 0         | 0         | 3 (4.4)   | 0         | 0         | 0         | 0         | 0        |
| Surgical resection, n (%)      | n/a       | n/a       | 23 (33.3) | 5 (7.0)   | 19 (28.4) | 0         | 5 (13.9)  | n/a      |
| Treatment outcome, n (%)       |           |           |           |           |           |           |           |          |
| Microbiologic success          | 3 (11.5)  | 4 (30.8)  | 31 (44.9) | 67 (94.4) | 28 (41.8) | 8 (61.5)  | 19 (52.8) | 4 (50.0) |
| Symptomatic improvement        | 13 (50.0) | 10 (76.9) | 37 (53.6) | 68 (95.8) | 40 (59.7) | 11 (84.6) | 18 (50.0) | 4 (50.0) |
| Radiographic improvement       | 10 (38.5) | n/a       | 30 (43.5) | 61 (85.9) | 22 (32.8) | 7 (53.8)  | 16 (44.4) | 2 (25.0) |

Abbreviation: IQR, Interquartile range; n/a, not applicable.





|                                  |                  |                  |        |                  |                  |        |                  |                  |        |
|----------------------------------|------------------|------------------|--------|------------------|------------------|--------|------------------|------------------|--------|
| Total treatment                  | 24.1 [16.0-43.1] | 24.7 [16.0-61.0] | 0.422  | 28.7 [23.7-60.0] | 23.9 [15.8-42.3] | 0.034  | 18.2 [14.9-24.0] | 22.2 [10.6-25.2] | 0.559  |
| Use of parenteral drug(s)        | 1.0 [0.5-4.0]    | 1.3 [1.0-9.0]    | 0.005  | 1.0 [1.0-4.0]    | 1.0 [1.0-1.5]    | 0.183  | 0.5 [0.5-1.0]    | 1.0 [0.6-1.6]    | 0.208  |
| Surgical resection <sup>  </sup> | 36 (20.7)        | 16 (19.8)        | >0.999 | 13 (22.8)        | 9 (21.4)         | >0.999 | 7 (8.5)          | 0                | >0.999 |

Abbreviation: subsp., subspecies; IQR, Interquartile range.

\*Including patient who used clarithromycin first, then changed to use azithromycin. <sup>†</sup>Including patient who used azithromycin first, then changed to use clarithromycin.

<sup>‡</sup>Including patient who used cefoxitin first, then changed to use imipenem. <sup>§</sup> Including patient who used imipenem first, then changed to use cefoxitin.

<sup>¶</sup>Information on treatment duration was not available in 18 patients

<sup>||</sup>Information on surgical resection was not available in 48 patients.

Symptomatic improvement was determined at the completion of treatment based on the duty physicians’ judgement.



|                                  |                  |                  |        |                  |                  |       |                  |                  |       |
|----------------------------------|------------------|------------------|--------|------------------|------------------|-------|------------------|------------------|-------|
| Total treatment                  | 23.6 [15.1-35.0] | 30.0 [18.7-67.6] | <0.001 | 26.4 [18.2-54.0] | 25.9 [19.0-50.1] | 0.812 | 18.2 [14.8-24.0] | 20.1 [14.0-24.2] | 0.599 |
| Use of parenteral drug(s)        | 1.0 [0.5-3.2]    | 1.0 [1.0-7.0]    | <0.001 | 1.0 [1.0-4.0]    | 1.0 [1.0-1.0]    | 0.089 | 0.5 [0.5-1.0]    | 1.0 [0.5-1.6]    | 0.105 |
| Surgical resection <sup>  </sup> | 21 (15.4)        | 31 (26.1)        | 0.043  | 6 (17.1)         | 16 (25.0)        | 0.453 | 5 (6.9)          | 2 (11.8)         | 0.615 |

Abbreviation: subsp., subspecies; IQR, Interquartile range.

\*Including patient who used clarithromycin first, then changed to use azithromycin. <sup>†</sup>Including patient who used azithromycin first, then changed to use clarithromycin.

<sup>‡</sup>Including patient who used cefoxitin first, then changed to use imipenem. <sup>§</sup> Including patient who used imipenem first, then changed to use cefoxitin.

<sup>¶</sup> Information on treatment duration was not available in 5 patients

<sup>||</sup> Information on surgical resection was not available in 35 patients.

Radiographic improvement was determined at the completion of treatment based on the duty physicians' judgement. Radiographic records of thirteen patients were not retrieved.

Table E7. Pooled treatment success rates according to the baseline characteristics

|                                                |                                   | Total (n=303)    |                               |           |                       | <i>M. abscessus</i> subsp. <i>abscessus</i><br>pulmonary disease (n=126) |                               |           |                       | <i>M. abscessus</i> subsp. <i>massiliense</i><br>pulmonary disease (n=95) |                               |            |                       |
|------------------------------------------------|-----------------------------------|------------------|-------------------------------|-----------|-----------------------|--------------------------------------------------------------------------|-------------------------------|-----------|-----------------------|---------------------------------------------------------------------------|-------------------------------|------------|-----------------------|
|                                                |                                   | Events<br>/Total | Treatment<br>success<br>rates | 95% CI    | <i>P</i> <sup>2</sup> | Events<br>/Total                                                         | Treatment<br>success<br>rates | 95% CI    | <i>P</i> <sup>2</sup> | Events<br>/Total                                                          | Treatment<br>success<br>rates | 95% CI     | <i>P</i> <sup>2</sup> |
| Age                                            | ≥ 60                              | 77/144           | 43.1                          | 228-63.4  | 84.2                  | 23/63                                                                    | 33.5                          | 14.6-52.4 | 61.9                  | 36/40                                                                     | 69.4                          | 6.5-100.0  | 84.4                  |
|                                                | <60                               | 87/159           | 49.7                          | 30.2-69.5 | 81.0                  | 22/63                                                                    | 34.9                          | 13.6-56.1 | 66.4                  | 46/55                                                                     | 70.2                          | 23.8-100.0 | 58.8                  |
| Sex                                            | Female                            | 135/238          | 45.8                          | 27.3-64.2 | 86.5                  | 33/91                                                                    | 31.9                          | 16.9-48.7 | 43.9                  | 71/79                                                                     | 89.5                          | 52.3-100.0 | 59.2                  |
|                                                | Male                              | 29/65            | 40.0                          | 16.6-63.4 | 74.2                  | 12/35                                                                    | 36.6                          | 11.8-64.9 | 48.4                  | 11/16                                                                     | 45.4                          | 0.0-100.0  | 83.0                  |
| BMI                                            | ≥20.5                             | 86/153           | 60.1                          | 45.6-74.6 | 56.5                  | 18/56                                                                    | 42.3                          | 27.5-57.1 | 2.1                   | 45/49                                                                     | 74.5                          | 15.3-100.0 | 75.1                  |
|                                                | <20.5                             | 78/150           | 44.5                          | 29.7-59.2 | 64.9                  | 27/70                                                                    | 36.4                          | 23.2-50.5 | 0.0                   | 37/46                                                                     | 65.0                          | 16.2-100.0 | 69.5                  |
| Respiratory<br>comorbidities                   | Absence                           | 37/82            | 50.1                          | 29.1-71.1 | 76.5                  | 11/35                                                                    | 34.1                          | 9.1-59.1  | 65.5                  | 11/14                                                                     | 82.1                          | 30.4-100.0 | 2.5                   |
|                                                | Presence                          | 127/221          | 45.6                          | 23.8-67.4 | 90.0                  | 34/91                                                                    | 34.3                          | 15.9-52.6 | 59.8                  | 71/81                                                                     | 57.1                          | 6.2-99.7   | 78.6                  |
| Radiographic<br>features prior to<br>treatment | Nodular<br>bronchiectatic         | 114/196          | 50.4                          | 25.3-75.4 | 91.3                  | 29/80                                                                    | 32.7                          | 12.3-53.2 | 70.2                  | 63/71                                                                     | 64.3                          | 9.9-100.0  | 84.5                  |
|                                                | Fibrocavitary or<br>indeterminate | 50/108           | 42.9                          | 26.7-59.1 | 68.7                  | 16/46                                                                    | 29.0                          | 8.0-55.0  | 62.0                  | 19/24                                                                     | 75.0                          | 26.2-100.0 | 62.8                  |

Abbreviation: BMI, Body mass index

Table E8. Association of individual drugs with symptomatic improvement

|                | Total (n=303)   |           |         | <i>M. abscessus</i> subsp. <i>abscessus</i><br>pulmonary disease (n=126) |            |         | <i>M. abscessus</i> subsp. <i>massiliense</i><br>pulmonary disease (n=95) |            |         |
|----------------|-----------------|-----------|---------|--------------------------------------------------------------------------|------------|---------|---------------------------------------------------------------------------|------------|---------|
|                | Adjusted<br>OR* | 95% CI    | P-value | Adjusted<br>OR*                                                          | 95% CI     | P-value | Adjusted<br>OR*                                                           | 95% CI     | P-value |
| Clarithromycin | 0.78            | 0.43-1.41 | 0.408   | 0.20                                                                     | 0.07-0.62  | 0.005   | 0.16                                                                      | 0.02-1.41  | 0.096   |
| Azithromycin   | 1.67            | 0.92-3.05 | 0.093   | 4.58                                                                     | 1.48-14.2  | 0.007   | 6.82                                                                      | 0.81-87.6  | 0.075   |
| Cefoxitin      | 0.72            | 0.41-1.27 | 0.255   | 1.12                                                                     | 0.45-2.77  | 0.810   | 3.55                                                                      | 0.29-43.0  | 0.306   |
| Imipenem       | 0.93            | 0.50-1.76 | 0.833   | 0.74                                                                     | 0.15-3.54  | 0.711   | 0.21                                                                      | 0.03-1.37  | 0.113   |
| Amikacin       | 2.95            | 1.26-6.91 | 0.007   | 19.5                                                                     | 2.01-189.7 | 0.003   | 31.7                                                                      | 3.70-271.6 | 0.002   |

Abbreviation: subsp., subspecies; OR, odds ratio.

\* Adjusted for age, sex, body mass index, initial radiographic finding, and presence of respiratory comorbidity

Table E9. Association of individual drugs with radiographic improvement

|                | Total (n=290)   |           |         | <i>M. abscessus</i> subsp. <i>abscessus</i><br>pulmonary disease (n=122) |           |         | <i>M. abscessus</i> subsp. <i>massiliense</i><br>pulmonary disease (n=93) |           |         |
|----------------|-----------------|-----------|---------|--------------------------------------------------------------------------|-----------|---------|---------------------------------------------------------------------------|-----------|---------|
|                | Adjusted<br>OR* | 95% CI    | P-value | Adjusted<br>OR*                                                          | 95% CI    | P-value | Adjusted<br>OR*                                                           | 95% CI    | P-value |
| Clarithromycin | 0.67            | 0.39-1.16 | 0.159   | 0.16                                                                     | 0.06-0.49 | 0.011   | 1.39                                                                      | 0.45-4.31 | 0.568   |
| Azithromycin   | 1.46            | 0.85-2.46 | 0.172   | 5.66                                                                     | 1.86-17.2 | 0.005   | 0.96                                                                      | 0.30-3.09 | 0.942   |
| Cefoxitin      | 0.69            | 0.41-1.17 | 0.171   | 1.24                                                                     | 0.56-2.75 | 0.600   | 0.52                                                                      | 0.14-1.98 | 0.340   |
| Imipenem       | 1.48            | 0.81-2.71 | 0.201   | 2.06                                                                     | 0.52-8.20 | 0.312   | 0.87                                                                      | 0.22-3.53 | 0.848   |
| Amikacin       | 1.37            | 0.59-3.16 | 0.470   | 2.65                                                                     | 0.50-14.2 | 0.251   | 3.19                                                                      | 0.54-18.7 | 0.198   |

Abbreviation: subsp., subspecies; OR, odds ratio.

\* Adjusted for age, sex, body mass index, initial radiographic finding, and presence of respiratory comorbidity
